# Supplementary material for: Inhalation of marijuana affects Drosophila heart function
Source: PubMed Central journal article supplement (PMC6737967; doi:10.1242/bio.044081), 2019-07-19
Supplement: biolopen-8-044081-s1.pdf [file biolopen-8-044081-s1.pdf]

## Supplementary information

|                                      |                                                                                                                                                                                                                                                                                    |                           |
|--------------------------------------|------------------------------------------------------------------------------------------------------------------------------------------------------------------------------------------------------------------------------------------------------------------------------------|---------------------------|
| Strain/variety                       | Current informal name: strain Moby Dick                                                                                                                                                                                                                                            |                           |
| Genetic                              | Hybrid that presents 60% genetic characteristic of <i>C. sativa</i> <i>subesp sativa</i> and 40% of <i>C. sativa subesp indica</i> . F1 from crossbreeding White Widow ( <i>C. sativa subesp sativa</i> x <i>C. sativa subesp indica</i> ) with Haze ( <i>C. sativa</i> ) strains. |                           |
| Chemical composition of cannabinoids | High content of THC.                                                                                                                                                                                                                                                               | % THC+CBD+CBN             |
|                                      | CBD: 1.00 mg/g of sample<br>THC: 113.70 mg/g of sample                                                                                                                                                                                                                             | %CBD= 0.85%<br>%THC=96.6% |
|                                      | CBN: 3.0 mg/g of sample<br>Ratio: THC/CBD= 114/1                                                                                                                                                                                                                                   | %CBN=2.55%                |
| Main medical use in Argentina        | Refractory epilepsy                                                                                                                                                                                                                                                                |                           |

**Table S1. Genetic and chemical characterization of the studied strain of *Cannabis sp.*** Vegetal material provided by the NGO

“Mamá Cultiva” was analyzed for determining % content of THC, CBD and CBN.

| <b>Cannabinoids</b> | <b>Boiling point (in °C)</b> |
|---------------------|------------------------------|
| Delta 9- THC        | 157                          |
| CBD                 | 180                          |
| CBN                 | 185                          |
| <b>Terpenoids</b>   |                              |
| Beta myrcene        | 166-168                      |
| Beta caryophyllene  | 119                          |
| d-limonene          | 177                          |
| 1,8-cineole         | 176                          |
| Alpha-pinene        | 156                          |
| Beta-cymene         | 177                          |
| Delta-3-carene      | 168                          |
| <b>Flavonoids</b>   |                              |
| Apigenin            | 178                          |
| Cannflavin A        | 182                          |
| Beta-sitosterol     | 134                          |
|                     |                              |

**Table S2. Vaporized components.** Temperature at which the main components present in *Cannabis sp* are vaporized in our conditions using a device setting at 188°C.

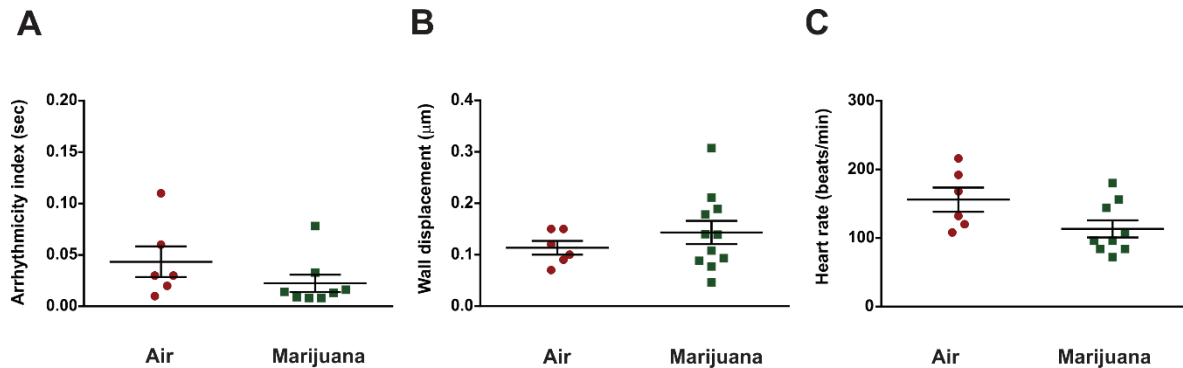

**Figure S1. Treatment interruption corroborates that positive inotropic effects are induced by long exposure.** 10 days old flies were subjected during the first 5 days to ambient air or cannabis and grown for another 5 days after treatment interruption. A-C: Average results ( $\pm$  SEM). A. Arrhythmicity index was not augmented in the treated group. N = 6, 8. B. Contractility is not augmented after treatment interruption. N = 6, 9. C. Heart rate is similar between both groups. N = 6,11. Student's test (two tails) was utilized for comparison between two groups. A p-value < 0.05 was considered significant.

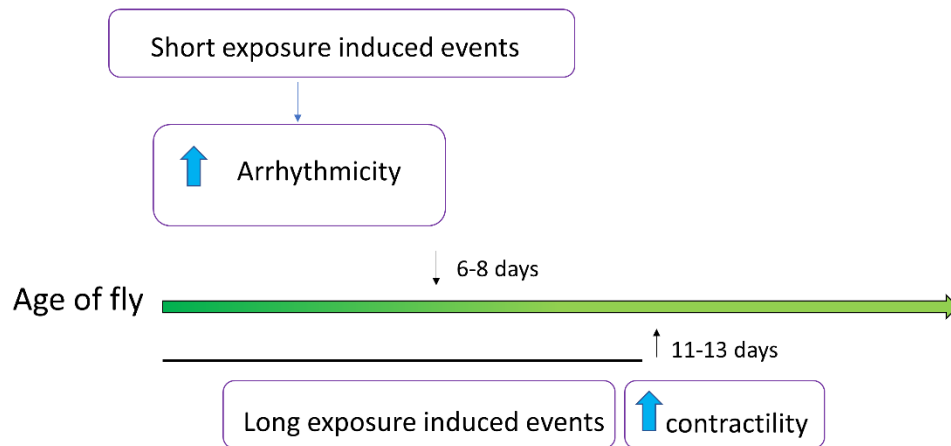

**Figure S2. Classification of cardiac parameters affected by cannabis in relation to time of treatment and age of flies.** Arrhythmic pattern is induced by short periods of treatment. Contractility is augmented only in response to long-term treatment.

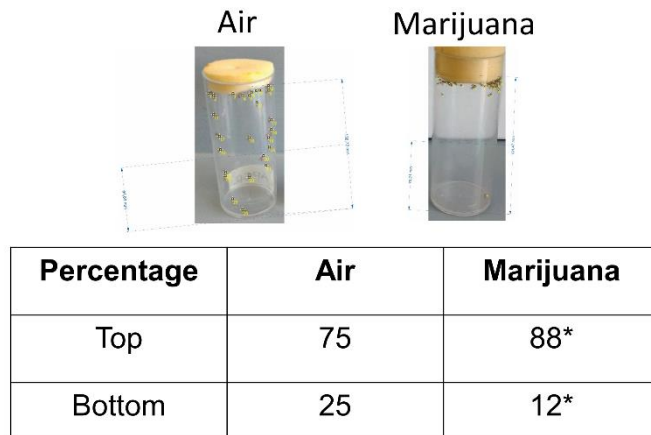

**Figure S3. Flies exposed to cannabis exhibit a different behavioral pattern.** Images captured from recordings of flies exposed to air or marijuana. Compared to controls (Air) flies receiving marijuana crowded at the top of the vials. Results are expressed as percentage of flies localizing to the top of the vials/total number of flies and represent the average of 12 images for treated and non-treated groups. Percentage comparisons were made using Fisher test. A p-value < 0.05 was considered significant.
